# Supplementary material
Source: PubMed Central journal article supplement (PMC4380641)
Supplement: NIHMS651183-supplement-01.pdf [file NIHMS651183-supplement-01.pdf]

Table 2: Average Heart Rate and Uncorrected Measured QT (msec) Interval By Sub-Groups

| Variable                | Age ≤ 6 yo | Age < 2 yo | Age < 1 yo | HR ≥ 130 | HR < 130 | Male    | Female   |
|-------------------------|------------|------------|------------|----------|----------|---------|----------|
| <b>No. of Subjects</b>  | 702        | 567        | 233        | 247      | 455      | 382     | 320      |
| <b>Heart Rate (bpm)</b> |            |            |            |          |          |         |          |
| Average                 | 122        | 133        | 137        | 142      | 111      | 121     | 123      |
| Std. Dev.               | 20         | 18         | 18         | 13       | 13       | 20      | 20       |
| Min-Max                 | 70-189     | 91-189     | 100-189    | 113-198  | 70-151   | 70-185  | 78-189   |
| Range                   | 119        | 99         | 90         | 76       | 81       | 114     | 111      |
| <b>Measured QT</b>      |            |            |            |          |          |         |          |
| Average                 | 298        | 284        | 281        | 275      | 311      | 299     | 297      |
| Std. Dev.               | 27         | 23         | 22         | 18       | 23       | 28      | 26       |
| Min-Max                 | 217- 380   | 217-362    | 217-350    | 217-337  | 247 -380 | 222-380 | 217 -375 |
| Range                   | 163        | 145        | 133        | 120      | 133      | 158     | 158      |

(Online only)

Table 4: Slope of QTc-RR Regression Line for All Sub-Groups

| Formula           | Age $\leq$ 6 yo | Age < 2 yo     | Age < 1yo      | HR $\geq$ 130 | HR < 130       | Male           | Female         |
|-------------------|-----------------|----------------|----------------|---------------|----------------|----------------|----------------|
| <b>Bazett</b>     | <b>-0.0190</b>  | <b>-0.0165</b> | <b>-0.0156</b> | <b>0.0355</b> | <b>-0.0374</b> | <b>-0.0077</b> | <b>-0.0328</b> |
| <b>Fridericia</b> | 0.1028          | 0.1183         | 0.1230         | 0.1770        | 0.0755         | 0.1117         | 0.0920         |
| <b>Hodges</b>     | -0.1241         | -0.2024        | -0.2299        | -0.2743       | -0.0698        | -0.1075        | -0.1446        |
| <b>Framingham</b> | 0.2748          | 0.2964         | 0.3026         | 0.3494        | 0.2454         | 0.2812         | 0.2670         |

(Online only)
